# Supplementary material for: Kolkata-Coventry comparative registry study of acute heart failure: an insight into the impact of public, private and universal health systems on patient outcomes in low–middle income cities (KOLCOV HF Study)
Source: PubMed Central journal article supplement — Open Heart. 2022 May 31;9(1):e001964. doi: 10.1136/openhrt-2022-001964 (PMC9157346; doi:10.1136/openhrt-2022-001964), 2022-05-31
Supplement: openhrt-2022-001964supp001.pdf [file openhrt-2022-001964supp001.pdf]

**Supplementary Table: Comparison of triple HF therapy versus no therapy in the HFREF cohort across the three hospitals**

| HF Medications- n (%)                      | Kolkata (India)          |                         | UHCW (UK)<br>(n=480) | p-value   |            |            |
|--------------------------------------------|--------------------------|-------------------------|----------------------|-----------|------------|------------|
|                                            | AGH (Private)<br>(n=388) | NRS (Public)<br>(n=216) |                      | NRS - AGH | UHCW - AGH | UHCW - NRS |
| ACE inhibitor/ARB, beta-blocker and MRA    | 34 (8.8)                 | 27 (12.5)               | 107 (22.2)           | 0.14      | <0.001     | 0.002      |
| No ACE inhibitor/ARB, beta-blocker and MRA | 99 (25.5)                | 21 (9.7)                | 64 (13.3)            | <0.001    | <0.001     | 0.18       |

ACEi- angiotensin-converting enzyme inhibitor; ARB- angiotensin receptor blockade; MRA- mineralocorticoid receptor antagonist
